# Supplementary material
Source: publisher figshare collection journal article supplement (https://frontiersin.figshare.com/ndownloader/files/27526040)
Supplement: Supplementary file [file 27526040]

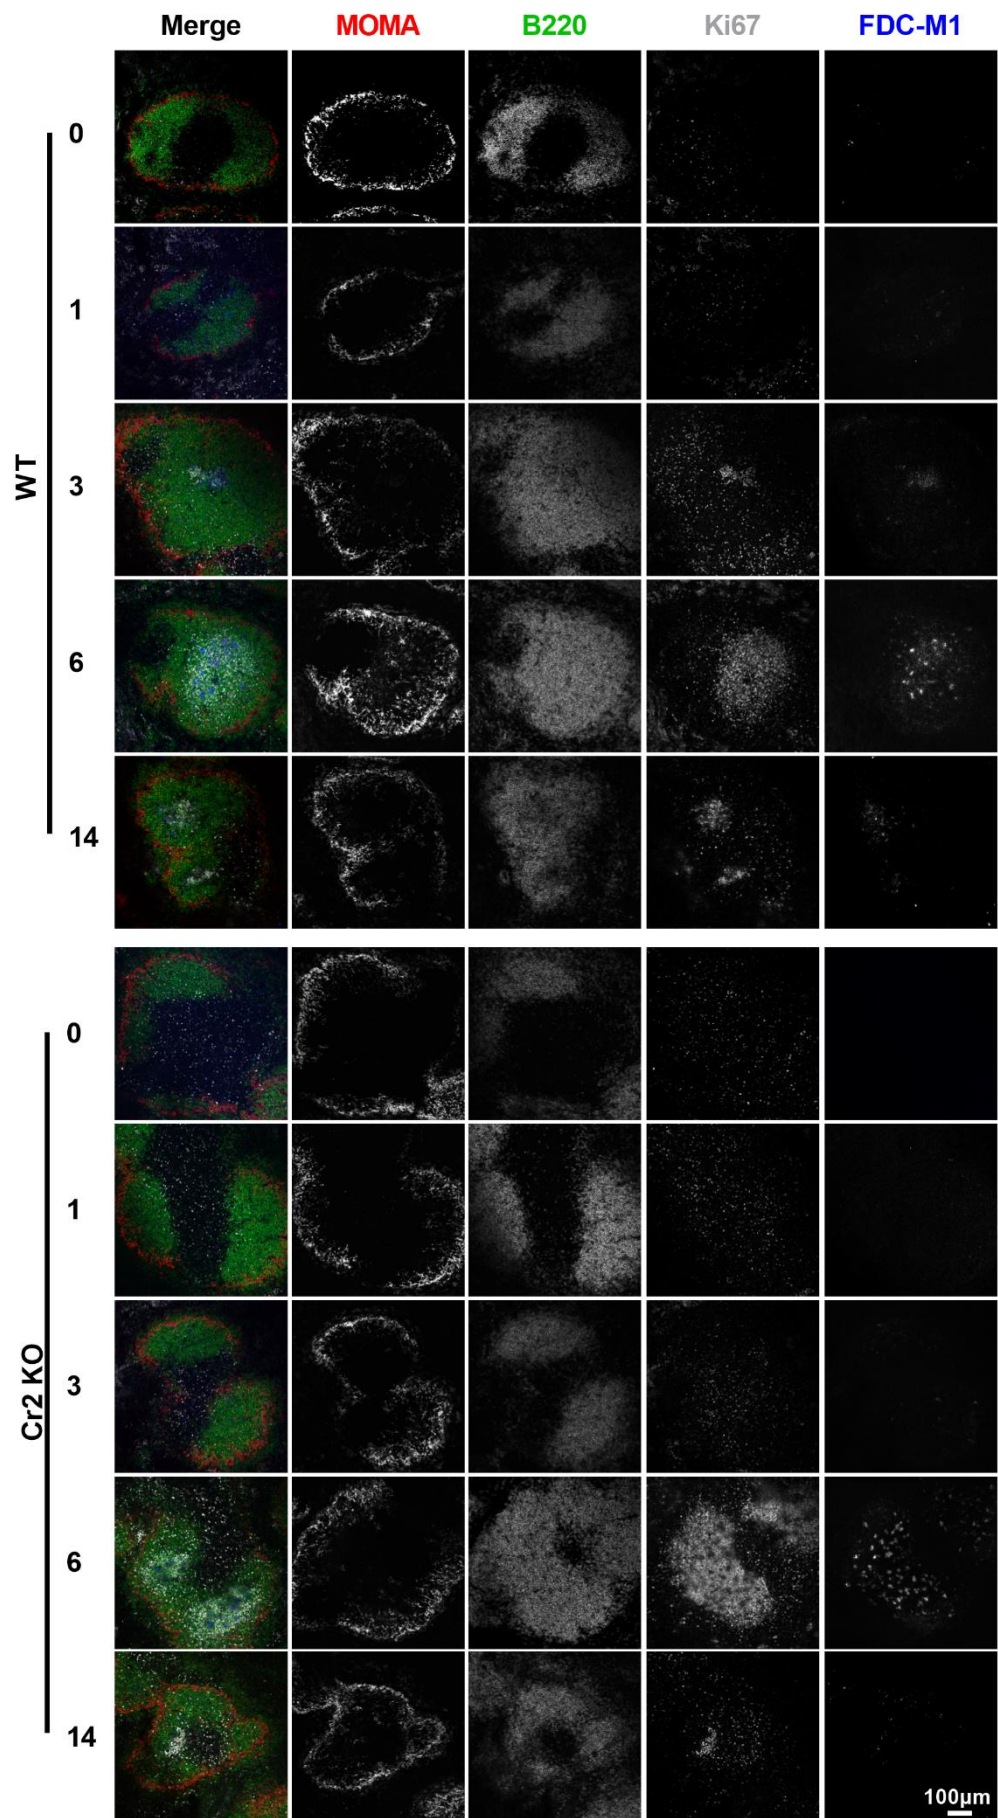

**Supplementary Figure 2. Expanded representative images of spleen white pulp regions.** WT or Cr2 KO mouse spleens and sera were harvested from unimmunized mice (day 0) and from mice immunized with  $5 \times 10^7$  SRBC 1, 3, 6, or 14 days before and sections prepared as described in Materials and Methods. Expanded representative images of splenic white pulp regions (surrounded by MOMA+ metallophilic macrophages, red), B cell follicles (B220, green), GCs (Ki67, grey) and FDCs (FDC-M1, blue). Data shown is representative of 6-9 mice per group pooled from three independent experiments.
